# Supplementary material for: Sandy loam soil maintains better physicochemical parameters and more abundant beneficial microbiomes than clay soil in Stevia rebaudiana cultivation
Source: PeerJ. 2024 Sep 19;12:e18010. doi: 10.7717/peerj.18010 (PMC11416757; doi:10.7717/peerj.18010)
Supplement: Supplemental Information 1 — Rs, rhizosphere soil of sandy loam soil; Bs, bulk soil of sandy loam soil; Rc, rhizosphere soil of clay soil; Bc, bulk soil of clay soil; pH, soil pH; OM, organic matter; TN, total nitrogen; AP, available phosphorus; AK, available potassium; MBC, microbial biomass carbon; MBN, microbial biomass nitrogen; BP, microbial biomass phosphorus [file peerj-12-18010-s001.xlsx]

## Sheet: Sheet1
Different samples	Treatment
		pH	OM（g/kg）	TN（g/kg）	AP（mg/kg）	AK（mg/kg）	MBC （mg/kg）	MBN（mg/kg）	MBP（mg/kg）
Rs1	Rs	7.02333	26.7337	2.13946	49.3366	93	648.443	50.6201	89.2059
Rs2	Rs	7.1	34.0402	2.86488	38.5022	97	720.911	76.2188	66.6748
Rs3	Rs	7.13	25.9397	2.49516	30.5502	88	878.946	53.6913	52.3998
Bs1	Bs	7.06	24.643	2.20435	32.3621	56	583.107	33.3095	53.877
Bs2	Bs	7.02333	25.9349	2.28911	30.7683	49	487.433	35.9049	69.9093
Bs3	Bs	6.44333	22.4083	2.24764	31.5002	53	465.354	45.007	52.209
Rc1	Rc	7.37667	21.0265	1.50433	4.97296	113	544.883	50.4202	33.5197
Rc2	Rc	7.60333	17.8512	1.53596	2.65666	57	558.466	72.9961	40.4209
Rc3	Rc	7.69667	17.0376	1.29679	4.72431	66	575.463	56.4815	30.1218
Bc1	Bc	7.67	16.2548	1.30828	7.43692	78	493.333	34.2593	40.0308
Bc2	Bc	7.83333	14.5823	1.23312	3.06728	97	411.667	33.4029	26.9091
Bc3	Bc	7.83667	14.293	1.21692	2.03718	129	456.135	36.1865	41.5418
	Rs:rhizosphere soil of sandy loam soil; Bs:bulk soil of sandy loam soil; Rc:rhizosphere soil of clay soil; Bc:bulk soil of clay soil.	pH:soil pH	OM:organic matter	TN:total nitrogen	AP:available phosphorus	AK:available potassium	MBC:microbial biomass carbon	MBN:microbial biomass nitrogen	MBP:microbial biomass phosphorus
