# Supplementary material for: Sandy loam soil maintains better physicochemical parameters and more abundant beneficial microbiomes than clay soil in Stevia rebaudiana cultivation
Source: PeerJ. 2024 Sep 19;12:e18010. doi: 10.7717/peerj.18010 (PMC11416757; doi:10.7717/peerj.18010)
Supplement: Supplemental Information 2 [file peerj-12-18010-s002.xlsx]

## Sheet: Sheet1
	height/cm
sandy loam soil	83	76.5	86	78	86	85	82.5	77.5	81.5	90
clay soil	55.5	55.5	59	50.5	57.5	59	58.5	52	60	56.5
	stem diameter/cm
sandy loam soil	1.54	1.5	1.51	1.46	1.47	1.57	1.49	1.47	1.55	1.55
clay soil	0.95	0.97	0.96	0.93	0.94	0.97	0.85	0.97	0.97	0.94
	leaf dry weight plant/g
sandy loam soil	37.61	40.96	38.26	40.23	36.38	39.87	42.86	38.96	39.85	38.35
clay soil	30.57	30.54	28.34	23.53	26.81	25.07	27.47	23.12	21.03	30.98
	yield(kg/667m2)
sandy loam soil	405.02	365.03	388.25	403.8	410.89
clay soil	251.37	281.56	284.22	268.79	283.04
